# Supplementary material for: Engineering of a graphene oxide-based 2D platform for immune activation and modulation
Source: Royal Society of Chemistry journal article supplement (doi:10.1039/d5tb01438g), 2025-01-01
Supplement: d5tb01438g1.pdf [file d5tb01438g1.pdf]

# Supplementary information

## Engineering of a graphene oxide-based 2D platform for immune activation and modulation

Despoina Despotopoulou,<sup>ab</sup> Maria Stylianou,<sup>cd</sup> Luis M. Arellano,<sup>a</sup> Thomas Kisby,<sup>cd</sup> Neus Lozano,<sup>ae</sup> Kostas Kostarelos<sup>\*adef</sup>

<sup>a</sup> *Nanomedicine Lab, Catalan Institute of Nanoscience and Nanotechnology (ICN2), CSIC and BIST, Campus UAB, 08193 Barcelona, Spain*

<sup>b</sup> *Departament de Química, Facultat de Ciències, Universitat Autònoma de Barcelona, 08193, Bellaterra, Spain.*

<sup>c</sup> *NanoTherapeutics Lab, School of Biological Sciences and Manchester Cancer Research Centre, The University of Manchester, AV Hill Building, Manchester M13 9PT, United Kingdom*

<sup>d</sup> *Centre for Nanotechnology in Medicine, Faculty of Biology, Medicine & Health, The University of Manchester, Manchester, UK*

<sup>e</sup> *Institute of Neuroscience, Universitat Autònoma de Barcelona, 08913 Barcelona, Spain*

<sup>f</sup> *ICREA, Passeig de Lluís Companys 23, 08010 Barcelona, Spain*

Correspondence to: [kostas.kostarelos@icn2.cat](mailto:kostas.kostarelos@icn2.cat) or [kostas.kostarelos@manchester.ac.uk](mailto:kostas.kostarelos@manchester.ac.uk)

TABLE S1

Table S1. Main physicochemical properties of GO nanosheets used in this study.

Properties including lateral dimensions, thickness, optical properties, degree of defects, interlayer distance, surface charge, functionalization degree, chemical composition, and purity are indicated below.

| Material property                    | Technique                | Result                                                            |
|--------------------------------------|--------------------------|-------------------------------------------------------------------|
| Lateral dimensions                   | SEM                      | 50 - 950 nm [n = 946]                                             |
|                                      |                          | 95% < 450 nm                                                      |
|                                      |                          | Mean 144 nm                                                       |
|                                      | AFM                      | 10 - 890 nm [n = 2890]                                            |
|                                      |                          | 95% < 350 nm                                                      |
|                                      |                          | Mean 72 nm                                                        |
| Thickness                            | AFM                      | 1 nm (1 layer)                                                    |
| Optical properties                   | Absorption spectroscopy  | $\epsilon_{232}$ (mL $\mu\text{g}^{-1}$ $\text{cm}^{-1}$ )= 0.050 |
| Degree of defects ( $I_D/I_G$ )      | Raman spectroscopy       | $1.12 \pm 0.02$ [n=3]                                             |
| Peak ( $2\theta$ )                   | XRD                      | $12.36^\circ$ [n=1]                                               |
| Interlayer distance (nm)             |                          | 0.71                                                              |
| Surface charge ( $\zeta$ -Potential) | Electrophoretic mobility | $-47.2 \pm 0.7$ mV                                                |
| Functional groups                    | FTIR                     | $\nu(\text{C-H})$ : $2838\text{ cm}^{-1}$                         |
|                                      |                          | $\nu(\text{C=O})$ : $1735\text{ cm}^{-1}$                         |
|                                      |                          | $\nu(\text{C=C})$ : $1645\text{ cm}^{-1}$                         |
|                                      |                          | $\nu(\text{O-H})$ : $1423\text{ cm}^{-1}$                         |
|                                      |                          | $\nu(\text{C-O})$ : $1062\text{ cm}^{-1}$                         |
| Functionalization degree             | TGA                      | 30-75°C: 7% (water)                                               |
|                                      |                          | 200-250°C: 30%                                                    |
|                                      |                          | 250-950°C: 20%                                                    |
|                                      |                          | TOTAL 50%                                                         |
| Chemical composition (%)             | XPS                      | O: 29.6, C: 68.5, N: 1.1, S: 0.9                                  |
| Purity % (C+O)                       |                          | 98,0                                                              |
| C:O ratio                            |                          | 2,3                                                               |

# FIGURE S1

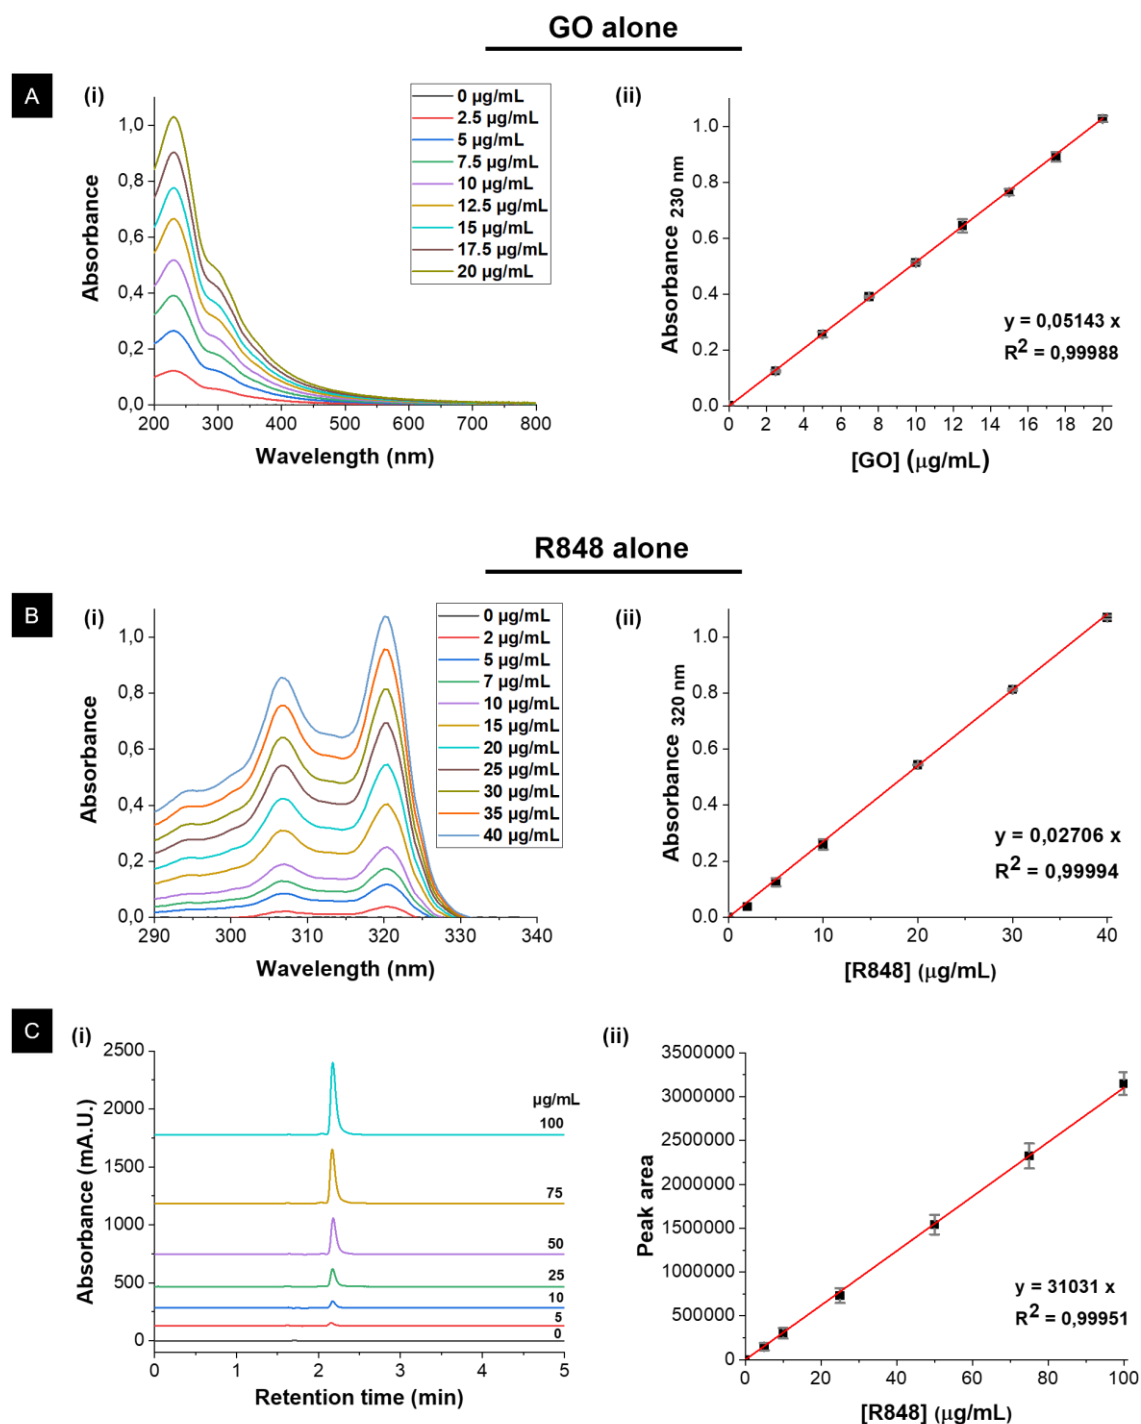

**Figure S1. Calibration data of GO and R848 alone.**

(A) UV-Vis calibration data of GO at concentrations ranging between 0 and 20  $\mu\text{g/mL}$  at the wavelength of 230 nm. (B) UV-Vis calibration curve of R848 at concentrations ranging between 0 and 40  $\mu\text{g/mL}$  at the wavelength of 320 nm. (C) HPLC calibration curve of R848 at concentrations ranging between 0 and 100  $\mu\text{g/mL}$  at the wavelength of 254 nm. In each case, the following is presented: (i) raw data of one indicative experimental run; (ii) calibration curves from data expressed as mean  $\pm$  SD ( $n=3$ ).

## FIGURE S2

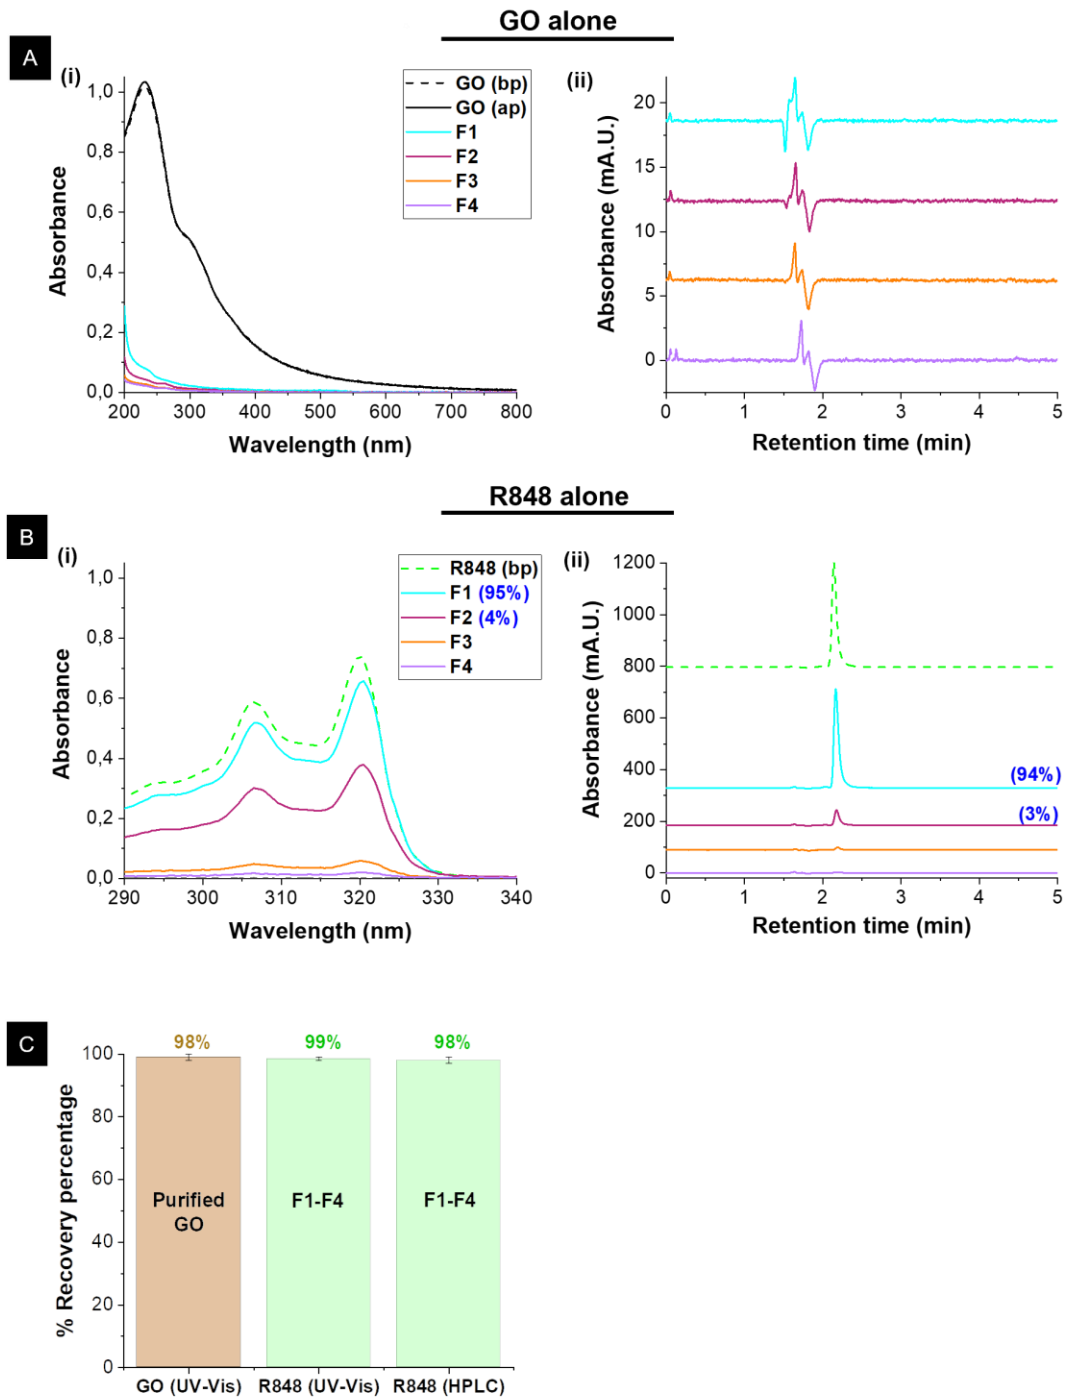

**Figure S2. Validation of purification method for GO and R848 controls.**

(A) GO control purification. (i) UV-Vis spectrum before (bp) (dashed line) and after (ap) purification (solid line) (GO (20  $\mu\text{g/mL}$ )), and signal of the corresponding filtrates (F1-F4) in the range 200-800 nm; (ii) HPLC chromatograms of GO filtrates (F1-F4). (B) R848 control purification. (i) UV-Vis spectrum before purification (bp) (dashed green line) and signal of the corresponding filtrates (F1-F4) in the range of 290-340 nm; (ii) HPLC chromatograms of R848 before purification (bp) and of the corresponding filtrates (F1-F4). All R848 quantity at the end of the procedure is present only in the filtrates. (C) Percentage (%) of GO recovery in the purified sample fraction on the filter (brown bar); and percentage (%) of R848 recovery washed in the filtrates (green bars) quantified by the two independent techniques and measurements: UV-Vis spectroscopy and HPLC. The results (generated by applying the formula (1)) are expressed as a mean  $\pm$  SD ( $n=3$ ).

# FIGURE S3

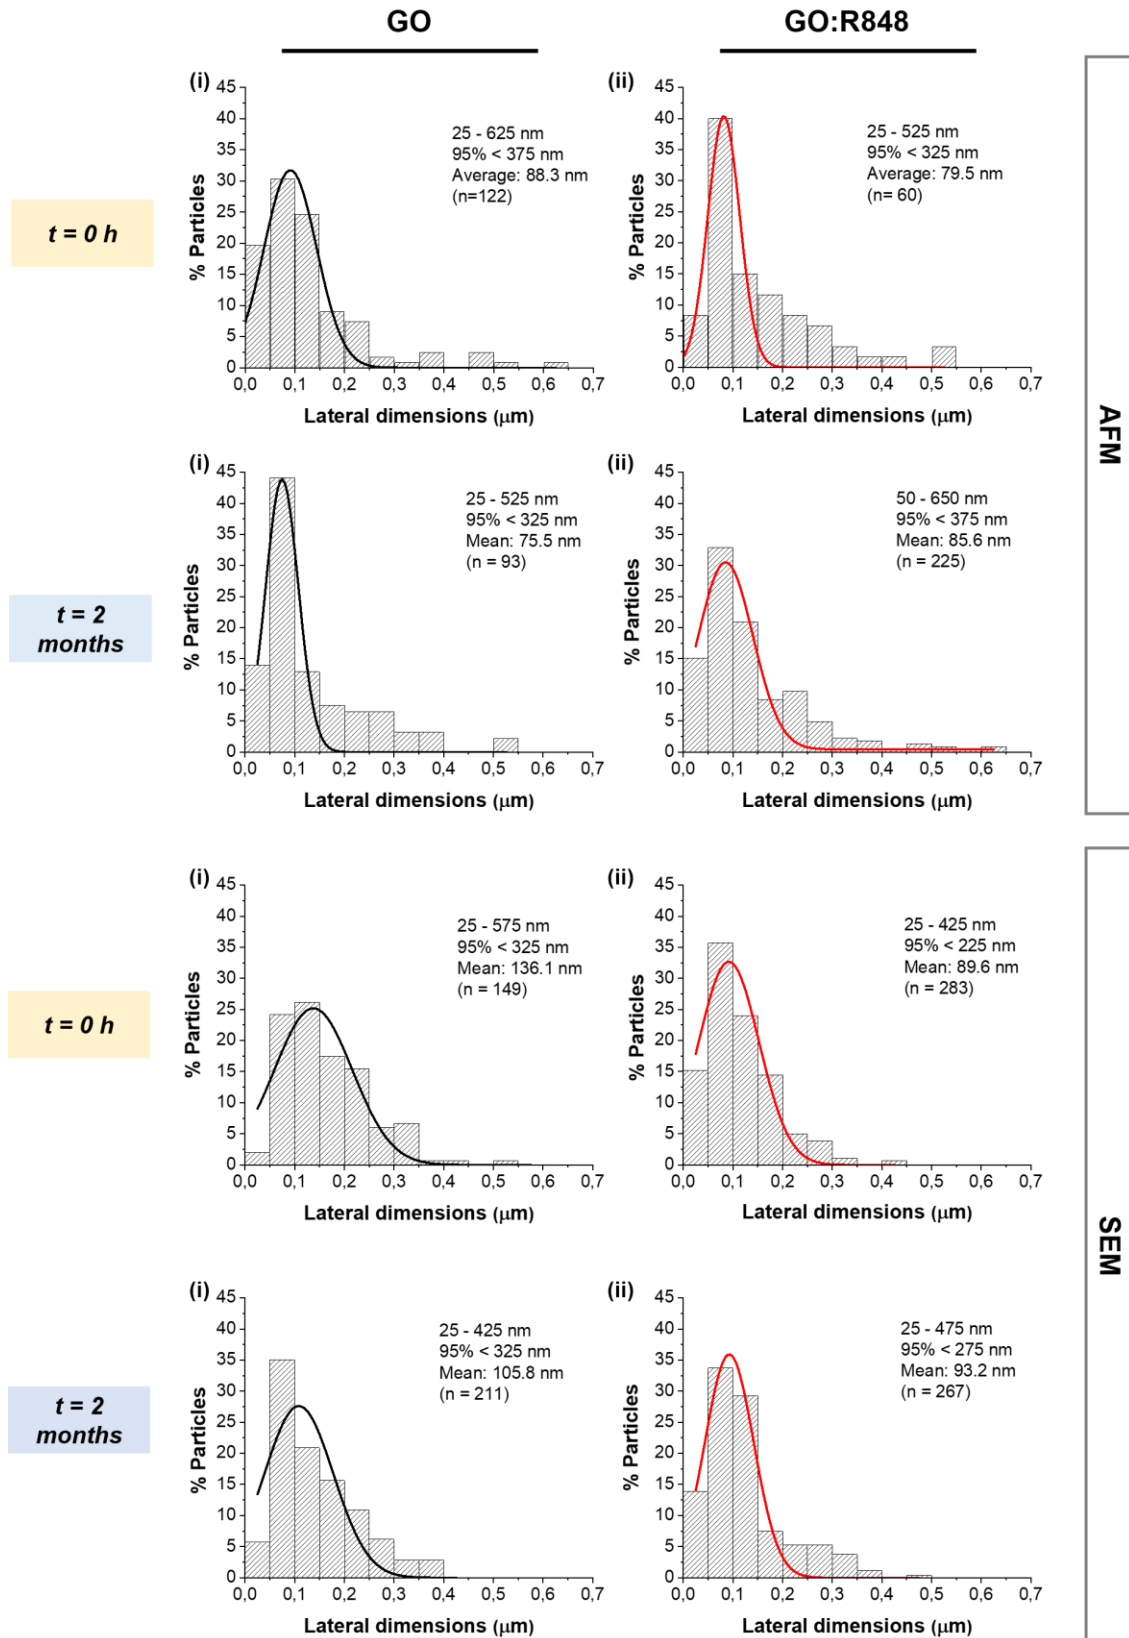

**Figure S3. Size distribution of GO nanosheets alone and in complex by AFM and SEM.**

The data were obtained from AFM and SEM images at t=0 h (yellow) and t=2 months (blue) for (i) GO control; (ii) GO:R848 complex after purification (ap) complex.

# FIGURE S4

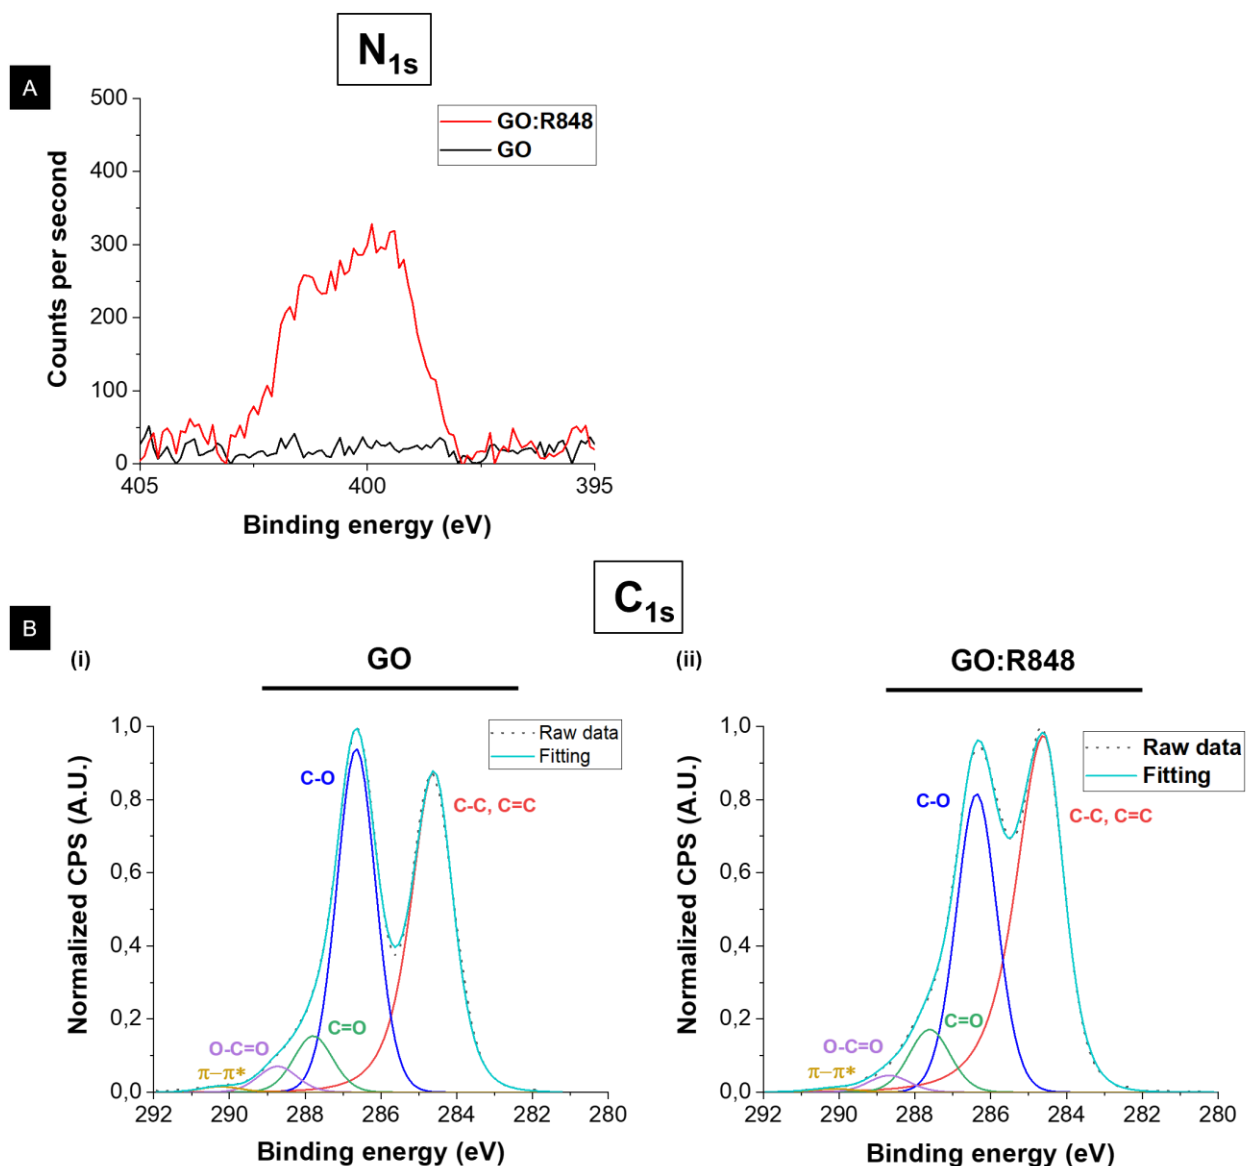

**Figure S4. N<sub>1s</sub> and C<sub>1s</sub> high-resolution XPS spectra.**

(A) N<sub>1s</sub> high resolution spectra for GO and GO:R848 complex after purification (ap) displayed in the binding energy range of 405-395 eV. (B) Deconvolution of C<sub>1s</sub> high-resolution spectrum in the binding energy range of 292-280 eV highlighting the corresponding functional groups for: (i) GO control; (ii) GO:R848 complex.

# FIGURE S5

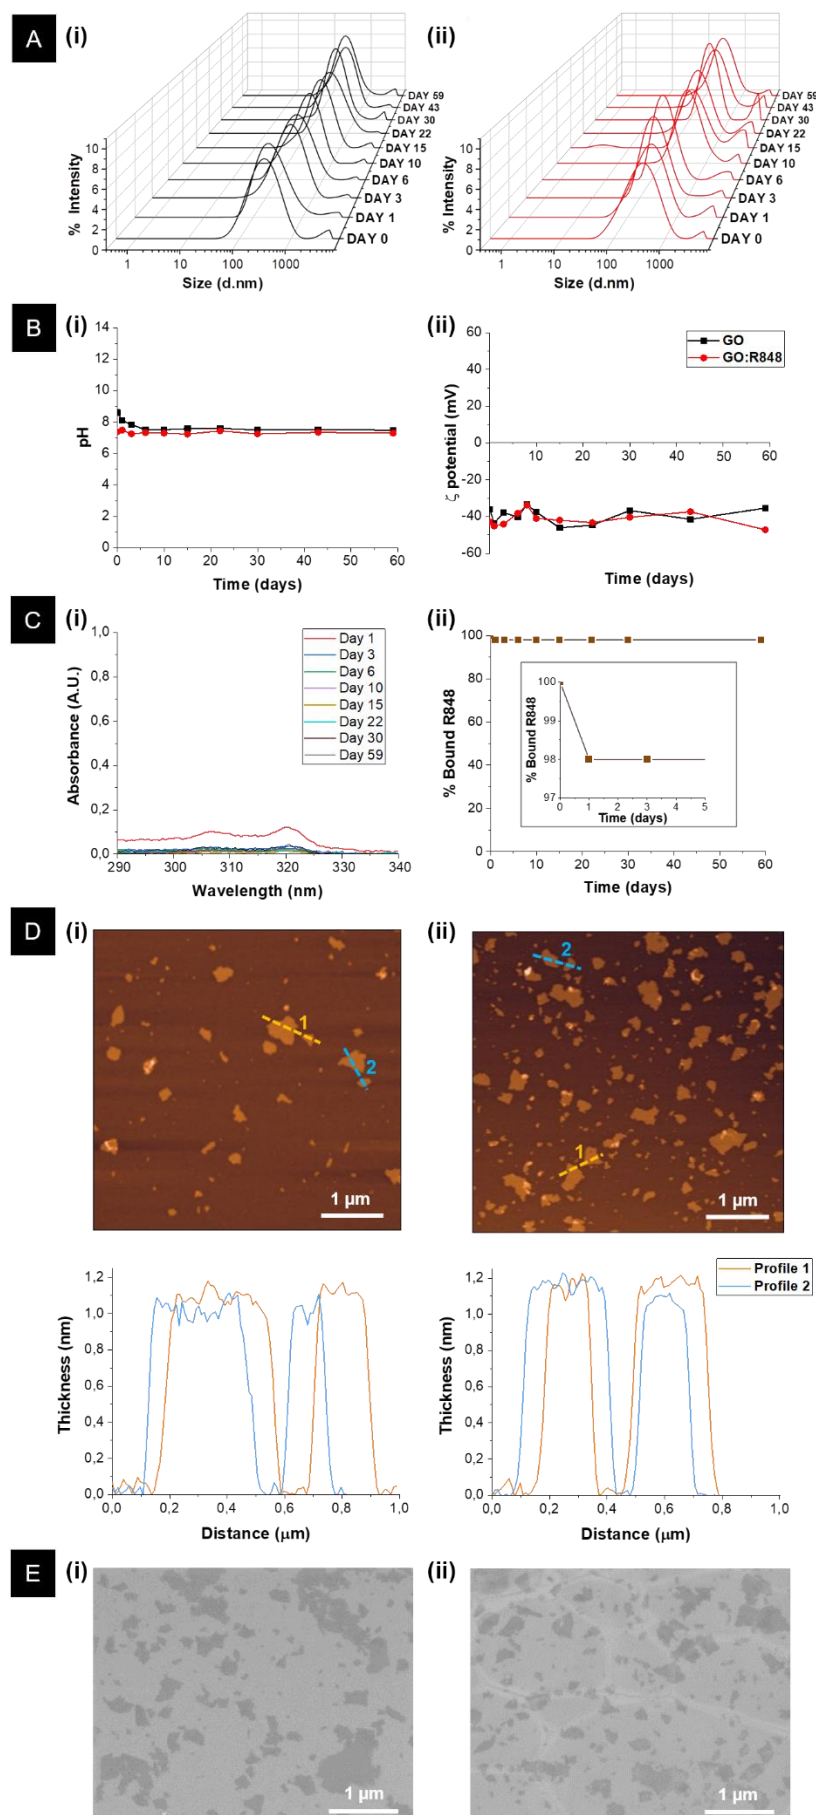

**Figure S5. Colloidal stability of GO:R848 complex after purification (ap) over 2 months.**

(A) Dynamic light scattering (DLS) plots showing the evolution of mean particle size over time. (i) GO control; (ii) GO:R848 complex. (B) Measurements over 2 months. (i) pH monitoring; (ii) Average particle surface charge ( $\zeta$ -potential) for GO control (black) and GO:R848 complex (red). (C) (i) UV-Vis spectra of GO:R848 filtrates (unbound R848) in the range of 290-340 nm over 2 months; Note that the spectrum shown in each time point is the sum of absorbance from all individual filtrates (F1-F4); (ii) Percentage (%) of R848 that remains bound on the GO surface over 2 months; Inset: Magnified plot showing a 2 % R848 release from the GO surface in the first day. (D) AFM height images after 2 months from corresponding nanosheets cross section and thickness graphs (shown underneath) for (i) GO control; (ii) GO:R848 complex. (E) SEM micrographs after 2 months for (i) GO control; (ii) GO:R848 complex. In all images, scale bars are 1  $\mu$ m.



## FIGURE S6

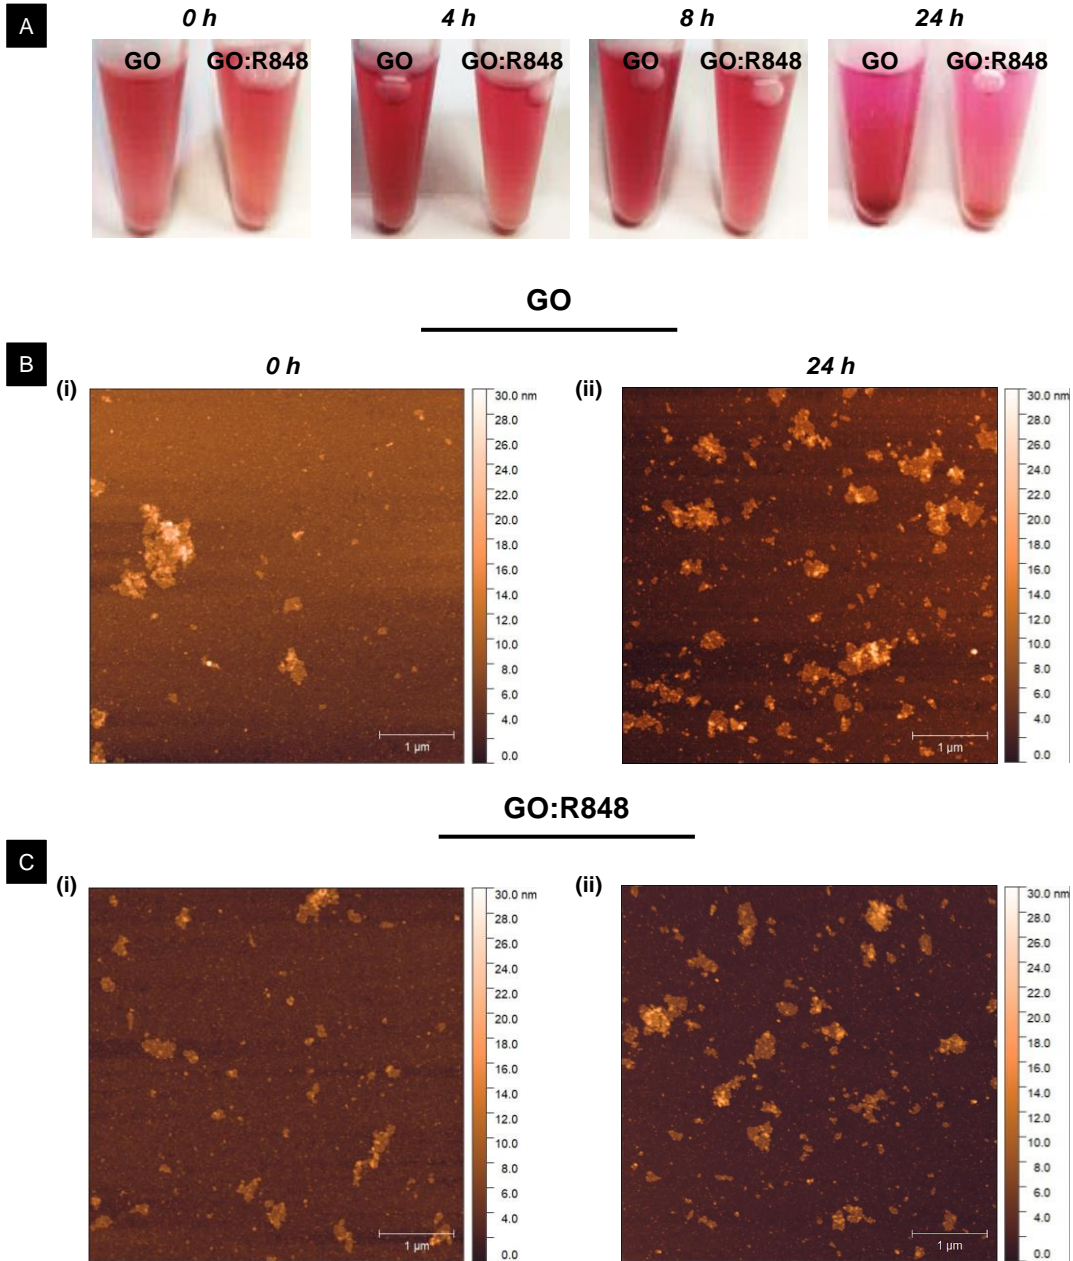

**Figure S6. Colloidal stability of GO:R848 complexes after purification (ap) in cell culture media (DMEM + 10% FBS) for 24 h.**

(A) Visual aspect of GO control and GO:R848 complex in media at various time points: 0, 4, 8 and 24 h. (B) AFM height images of GO control for (i) 0 h and (ii) 24 h. (C) AFM height images of GO:R848 complex for (i) 0 h and (ii) 24 h. Note that all samples were measured at a final GO concentration of 0.1 mg/mL after dilution in media.



**FIGURE S7**

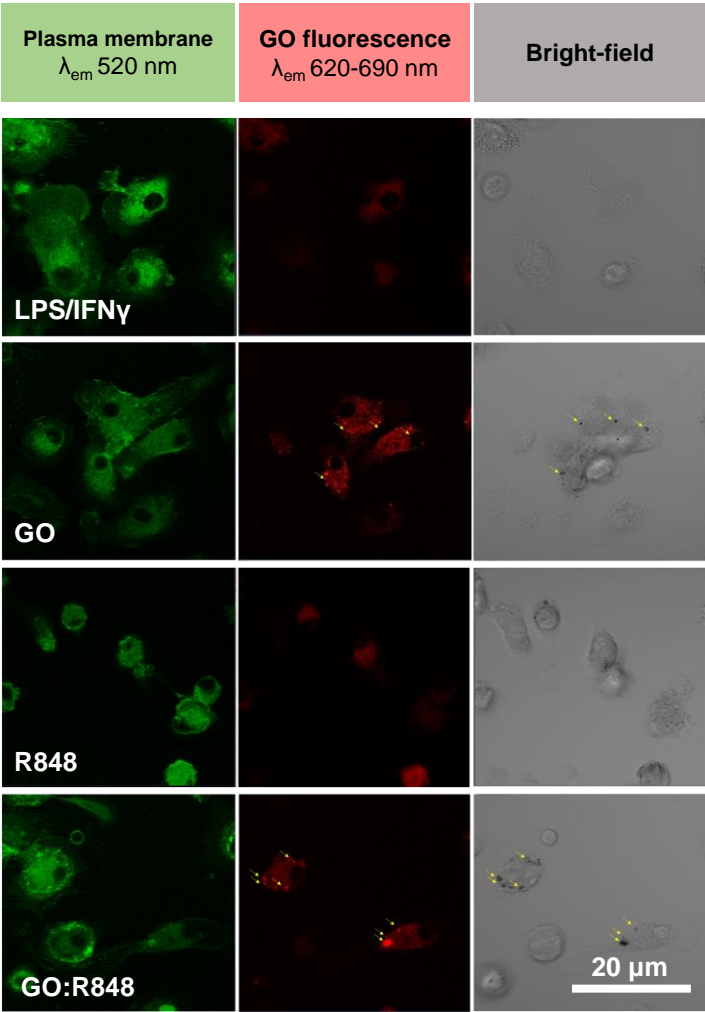

**Figure S7. Confocal images taken with zoom factor 1, showing the co-localization of GO and GO:R848 (10:4) with BMDM membrane dye (green), 2 h post-treatment.**

Red fluorescence field showing the autofluorescence of GO. Bright field confirmed the presence of GO black particles. Images were taken via confocal microscope at 40 $\times$  magnification. Representative images from n=6/condition, Scale bar 20  $\mu$ m.

## FIGURE S8

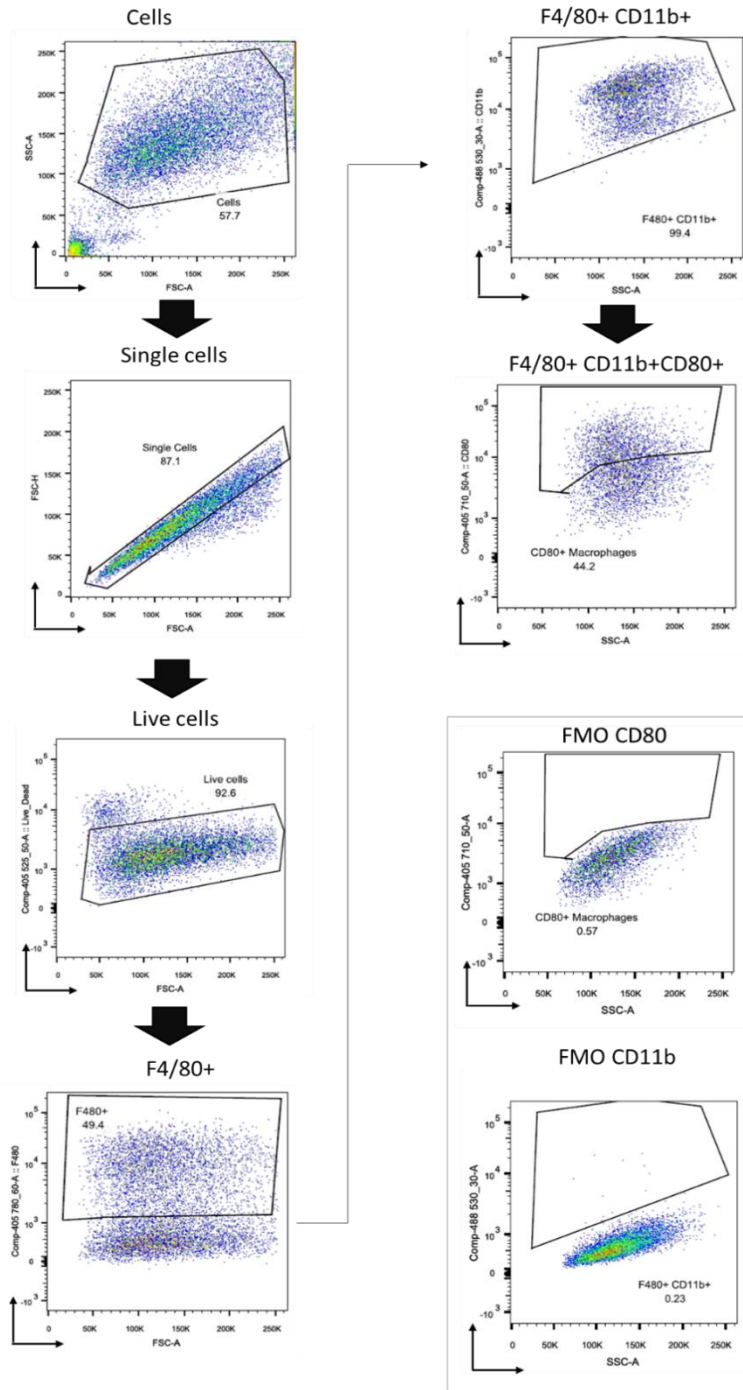

**Figure S8. Flow cytometry dot plots and gating strategy used for CD80<sup>+</sup>/F480<sup>+</sup> CD11b<sup>+</sup> cells.**

Indicative FACS data is shown of cells first isolated from debris; single cells gated to avoid clumps; live cells selected to avoid dead cells. F480<sup>+</sup> cells were taken forward from live cells and based on the fluorescence minus one (FMO) controls of CD11b and CD80, CD11b<sup>+</sup> and CD80<sup>+</sup> cells were gated.
